# Supplementary material for: Chemical pathways of epoxidized and hydroxylated fatty acid methyl esters and triglycerides with phosphoric acid
Source: Royal Society of Chemistry journal article supplement (doi:10.1039/c1jm10921a), 2011-01-01
Supplement: c1jm10921a.pdf [file c1jm10921a.pdf]

## Supporting Information

# Chemical Pathways of Epoxidized and Hydroxylated Fatty Acid Methyl Esters and Triglycerides with Phosphoric Acid

*Kollbe Ahn<sup>1</sup>, Stefan Kraft<sup>2</sup>, Susan Sun<sup>1\*</sup>*

<sup>1</sup>Bio-Materials & Technology Lab, Department of Grain Science & Industry, Kansas State

University, Manhattan, KS 66506

<sup>2</sup>Department of Chemistry, Kansas State University, Manhattan, KS 66506

**Figure S1**

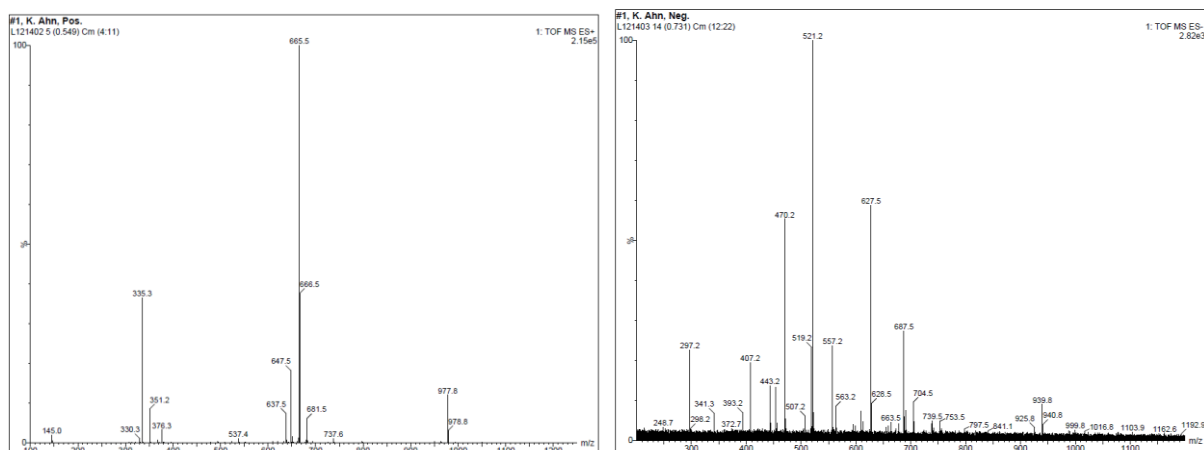

Positive ESI-MS (left) and negative ESI-MS (right) of **Polymer-5-6-T**

Figure S2

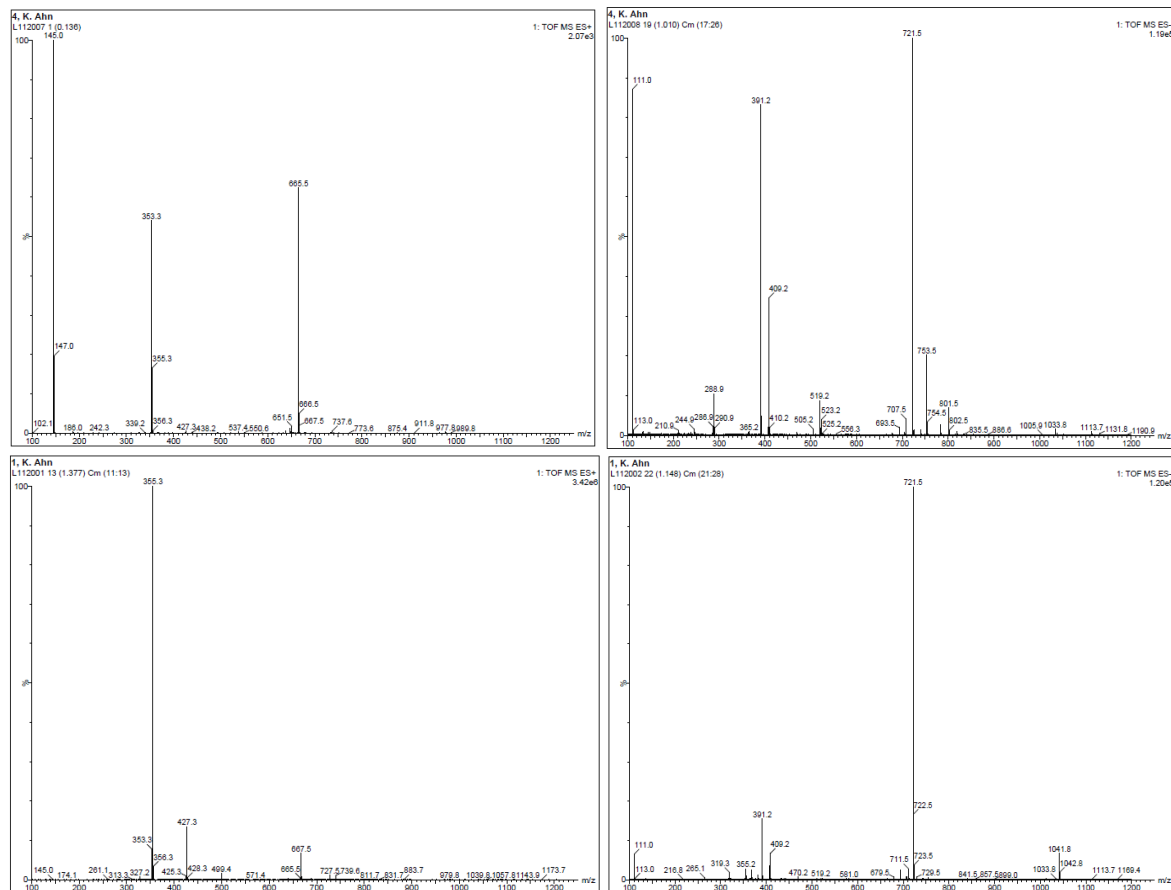

Top: Unlabeled reaction of positive ESI-MS (left) and negative ESI-MS (right) of **Polymer-5-6-P**.

Bottom:  $O^{18}$  labeled reaction of positive ESI-MS (left) and negative ESI-MS (right) of **Polymer-5-6-P**.

**Figure S3**

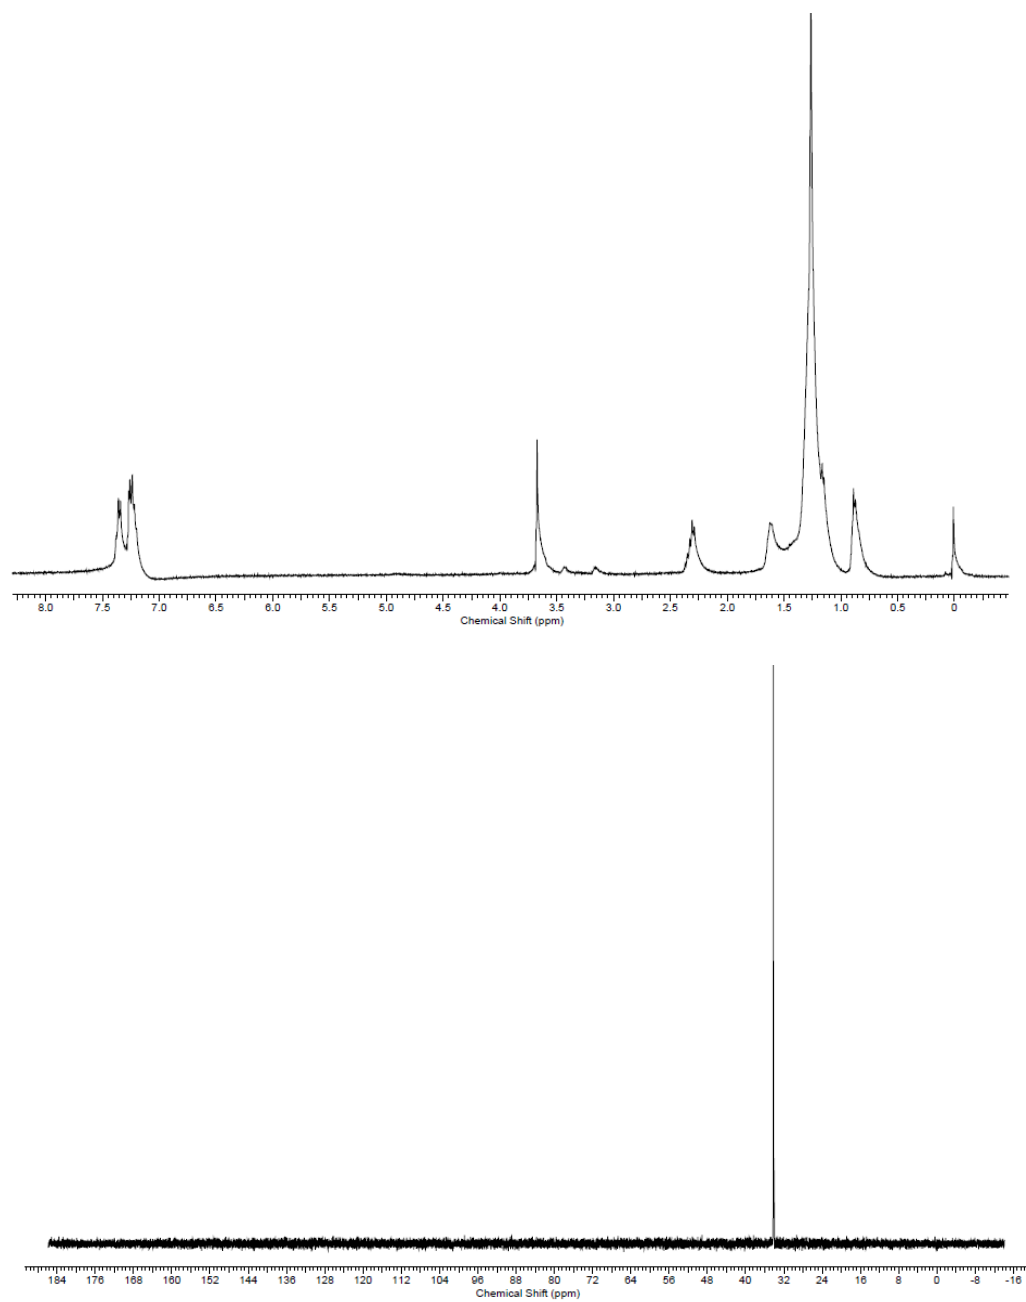

Top:  $^1\text{H}$  NMR of **9a-b**. Bottom:  $^{31}\text{P}$  NMR of **9a-b**
